## Correction

## Correction for: EpiAge: a next-generation sequencing-based *ELOVL2* epigenetic clock for biological age assessment in saliva and blood across health and disease

David Cheishvili<sup>1,2,3,\*</sup>, Sonia Do Carmo<sup>4,\*</sup>, Filippo Caraci<sup>6,7</sup>, Margherita Grasso<sup>7</sup>, A Claudio Cuello<sup>4,5</sup>, Moshe Szyf<sup>1,2</sup>

<sup>1</sup>EpiMedTech Global, Singapore 409051, Singapore

<sup>2</sup>HKG Epitherapeutics Ltd., Hong Kong SAR, China

<sup>3</sup>Gerald Bronfman Department of Oncology, McGill University, Montreal H4A 3T2, Canada

<sup>4</sup>Department of Pharmacology & Therapeutics, McGill University, Montreal H3G 1Y6, Canada

<sup>5</sup>Visiting Professor, Department of Pharmacology, Oxford University, Oxford OX13QT, UK

<sup>6</sup>Department of Drug and Health Sciences, University of Catania, Catania 95125, Italy

<sup>7</sup>Neuropharmacology and Translational Neurosciences Research Unit, Oasi Research Institute-IRCCS, Troina 94018, Italy

\*Equal contribution

**Correspondence to:** Moshe Szyf; email: [moshe.szyf@epimedtech.com](mailto:moshe.szyf@epimedtech.com), <https://orcid.org/0000-0003-3881-8214>

**Keywords:** epigenetic clock, elovl2, next-generation sequencing, EpiAge, Alzheimer's disease

**Original article:** *Aging (Albany NY)* 2025; 17: pp 131–160

PMID: [39853302](https://pubmed.ncbi.nlm.nih.gov/39853302/)

PMCID: [PMC11810066](https://pubmed.ncbi.nlm.nih.gov/PMC11810066/)

doi: [10.18632/aging.206188](https://doi.org/10.18632/aging.206188)

**This article has been corrected:** The authors recently found that the formula for the EpiAgePublic model shown in the “Development and application of the EpiAgePublic model to investigate biological aging dynamics” section contains a typographical error. Specifically, the coefficient for cg24724428 was incorrectly presented as **–30.44**, whereas the correct value is **+30.44**.

The model calculates beta values using the formula:

$$\left(\beta_{cg16867657} \times 122.70 + \beta_{cg21572722} \times 24.45 + \beta_{cg24724428} \times 30.44\right) - 42.91.$$

The authors stated that this correction does not affect the experimental outcome or conclusions of the study. The authors sincerely apologize for any inconvenience caused.
